# Supplementary material
Source: PubMed Central journal article supplement (PMC3758440)

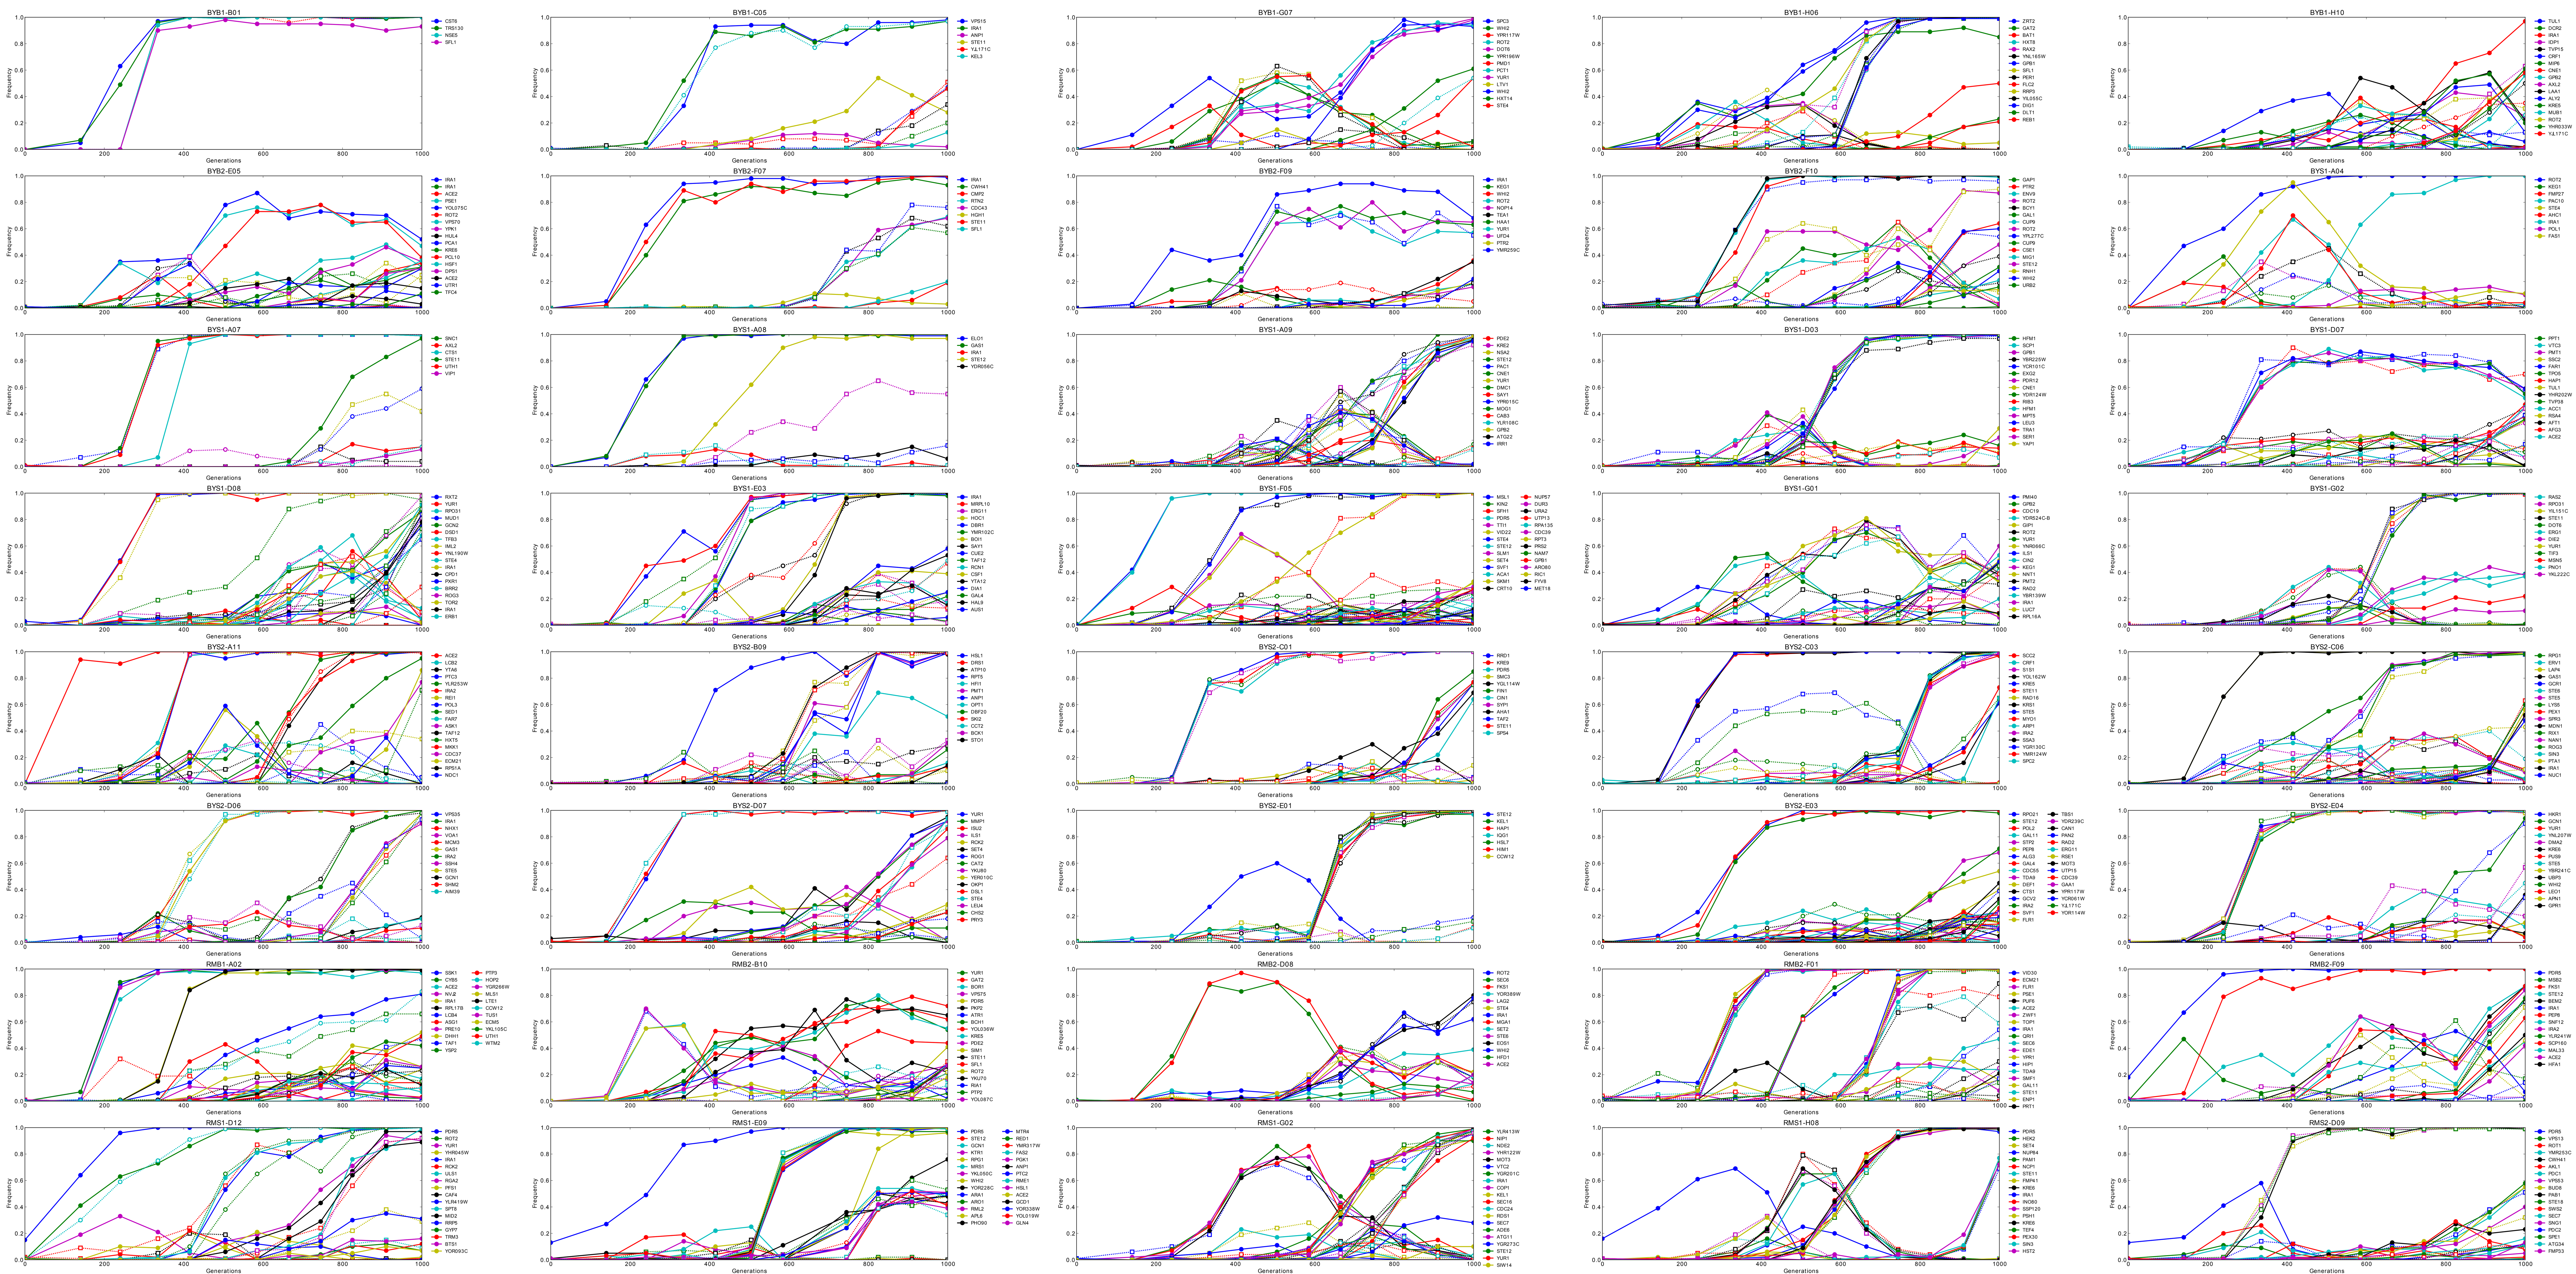

Figure S1

Supplement: NIHMS488396-supplement-3.pdf [file NIHMS488396-supplement-3.pdf]
